# Supplementary material
Source: Springer Nature journal article supplement (https://www.springermedizin.de/resource/supplementary/12885_2008_1497_MOESM5_ESM.pdf/9472166)

normal

FEA

DCIS

case 4

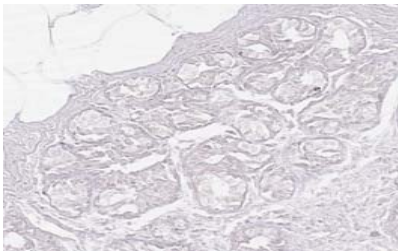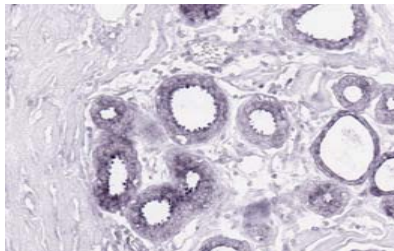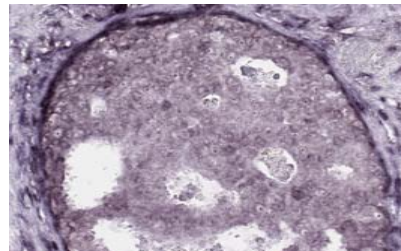

case 5

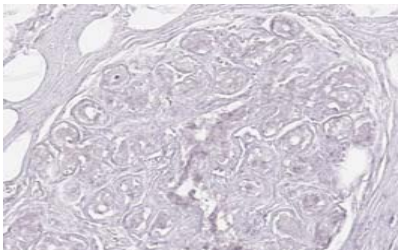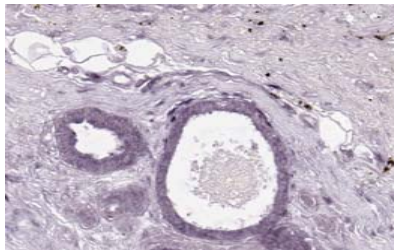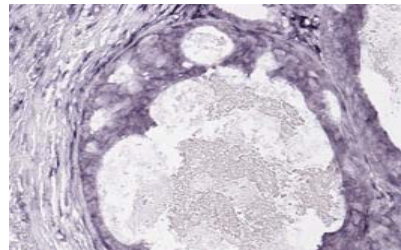

case 10

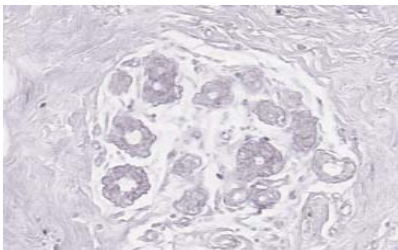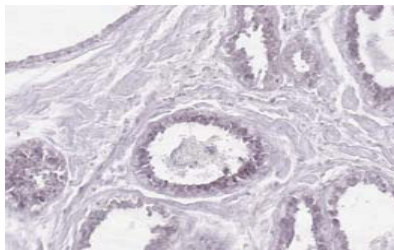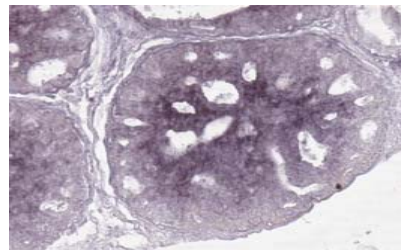

case 11

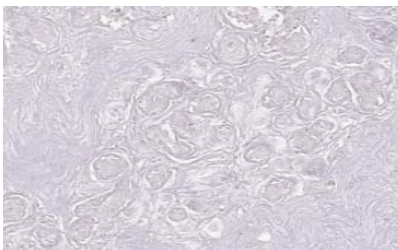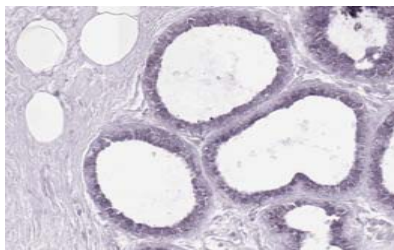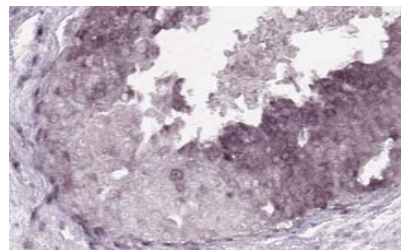

case 12

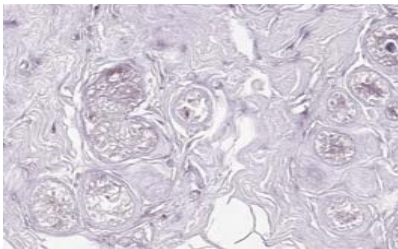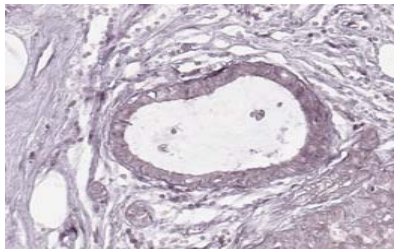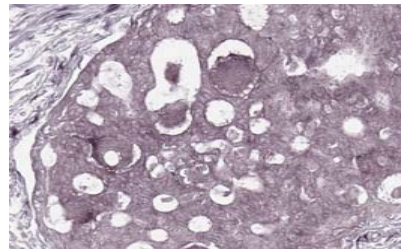

Supplement: MOESM5 [file 9472166]
